# Supplementary material for: Low temperature catalytic combustion of propane over Pt-based catalyst with inverse opal microstructure in a microchannel reactor
Source: Royal Society of Chemistry journal article supplement (doi:10.1039/b609599b), 2006-10-25
Supplement: b609599b.pdf [file b609599b.pdf]

## **Low temperature catalytic combustion of propane over Pt-based catalyst with inverse opal microstructure in microchannel reactor**

Guoqing Guan,<sup>\*a,b,c</sup> Ralf Zapf<sup>a</sup>, Gunther Kolb<sup>a</sup>, Yong Men<sup>a</sup>, Volker Hessel<sup>a,d</sup>, Holger Loewe<sup>a,e</sup>, Jianhui Ye<sup>e</sup>, and Rudolf Zentel<sup>e</sup>

<sup>a</sup> *Chemical Process Technology Department, Institut für Mikrotechnik Mainz GmbH, Carl-Zeiss-Strasse 18-20, D-55129 Mainz, Germany*

*Fax: +49-6131-990-205; Tel+49-6131-990-388;*

*E-mail: [guanguoqing@hotmail.com](mailto:guanguoqing@hotmail.com) and [guan@imm-mainz.de](mailto:guan@imm-mainz.de).*

<sup>b</sup> *Department of Life Environmental Science, Fukuoka Women's University, Fukuoka 813-8529, Japan*

<sup>c</sup> *School of Chemical Engineering, Sichuan University, Chengdu, Sichuan 610065, China.*

<sup>d</sup> *Department of Chemical Engineering and Chemistry, Eindhoven University of Technology, PO Box 513, STW 1, 35, 5600 MB Eindhoven, The Netherlands*

<sup>e</sup> *Institute of Organic Chemistry, Johannes Gutenberg University Mainz, Duisbergweg 10-14, 55128 Mainz, Germany*

## 1. The method to prepare aluminium sol

A stable aluminium sol was synthesised at first. During the synthesis, in solution A Pluronic P123 (EO<sub>20</sub>PO<sub>70</sub>EO<sub>20</sub>, EO=ethylene oxide, PO=propylene oxide; BASF) was dissolved in absolute ethyl alcohol (Aldrich) and stirred for 30min at room temperature. Solution B was prepared in the following way: aluminum-tri-sec-butylate (Al(OC<sub>4</sub>H<sub>9</sub>)<sub>3</sub>; Fluka) was diluted with absolute ethyl alcohol and stirred in a capped bottle for 15min, and then a mixture of acetylacetonate (AcAcH; Aldrich) and ethylacetoacetate (EAA; Aldrich) as stabilizer was added and stirred for 1h. Afterwards, the two solutions were mixed together, and further stirred for 2h. Then, deionized water and concentrated nitric acid were added drop by drop to adjust the pH value to 4.5, and a clear sol was formed. The molar ratio of Al(OC<sub>4</sub>H<sub>9</sub>)<sub>3</sub>:EtOH:AcAcH:EAA:P123:HNO<sub>3</sub>:H<sub>2</sub>O in the final solution was fixed to 1:20:0.2:0.8:0.008:0.02:3.

## 2. Micropore properties

Table 1 summarizes the micropore properties of the prepared original and catalyst-loaded Al<sub>2</sub>O<sub>3</sub> powders with inverse opal microstructure, which were determined by nitrogen sorption using a Sorptomatic 1990 (Carlo Erba Instruments) automatic apparatus. The prepared original Al<sub>2</sub>O<sub>3</sub> inverse opals have a high BET surface area of 230.3m<sup>2</sup>g<sup>-1</sup> and micropore volume of 0.69cm<sup>3</sup>g<sup>-1</sup> at p/p<sup>0</sup>=0.95 with a median pore radius of 6.7nm. Here, the formation of this kind of microporous structure is attributed to the addition of Pluronic P123 as a micropore structure directing agent in the prepared sol<sup>15</sup>. It should be noted that the larger macropores such as 300nm pores in the inverse opals (Fig.1(d)) were not detectable in such sorption experiments. On the other hand, the BET surface area, micropore volume and median pore radius were reduced to 144.4 m<sup>2</sup>/g, 0.34cm<sup>3</sup>g<sup>-1</sup> and 4.2nm, respectively, when Mo and Pt were loaded on it, indicating that Mo and Pt particles deposited on the surface of Al<sub>2</sub>O<sub>3</sub> inverse opals could block the open micropores to some extent, and reduce the total BET surface area.

## Reference

15 K. Niesz, P. Yang, G. A. Somorjai, *Chem. Commun.*, 2005,198.

**Table 1 Micropore properties of the original and catalyst-loaded Al<sub>2</sub>O<sub>3</sub> powders with inverse opal microstructure**

| Sample                               | Specific surface area (m <sup>2</sup> g <sup>-1</sup> ) | Total micropore volume (cm <sup>3</sup> g <sup>-1</sup> ) <sup>a</sup> | Median pore radius (nm) <sup>b</sup> |
|--------------------------------------|---------------------------------------------------------|------------------------------------------------------------------------|--------------------------------------|
| Al <sub>2</sub> O <sub>3</sub>       | 230.3                                                   | 0.69                                                                   | 6.7                                  |
| Pt/Al <sub>2</sub> O <sub>3</sub>    | 177.1                                                   | 0.45                                                                   | 4.3                                  |
| Pt/Mo/Al <sub>2</sub> O <sub>3</sub> | 144.4                                                   | 0.34                                                                   | 4.2                                  |

<sup>a</sup> Taken from the volume of N<sub>2</sub> adsorbed at P/P<sup>0</sup>=0.95.  
<sup>b</sup> Estimated using the desorption branch of the isotherm and the Barrett-Joyner-Halenda (BJH) formular.
